# Supplementary material for: Effectiveness of intravenous r-tPA versus UK for acute ischaemic stroke: a nationwide prospective Chinese registry study
Source: HighWire-hosted journal article supplement (doi:10.1136/svn-2020-000640), 2021-04-26
Supplement: svn-2020-000640supp001_data_supplement.pdf [file svn-2020-000640supp001_data_supplement.pdf]

Table S1 Baseline characteristics after propensity score matching in patients with 0.9 mg/kg r-tPA and 1.0-1.5×1,000,000 U UK.

| Variable                       | r-tPA<br>(N=773) | UK<br>(N=773)    | P value |
|--------------------------------|------------------|------------------|---------|
| Dose mg/U per kg               | 0.90             | 1.71 (1.43-2.00) | -       |
| Age, years                     | 63.2 (11.0)      | 62.9 (10.6)      | 0.557   |
| Male                           | 548 (70.9)       | 532 (68.8)       | 0.375   |
| BMI, kg/m <sup>2</sup>         | 24.1 (3.7)       | 24.4 (3.3)       | 0.156   |
| Educational level              |                  |                  | 0.475   |
| Primary school degree or below | 223 (28.8)       | 207 (26.8)       |         |
| Middle school degree           | 474 (61.4)       | 495 (64.0)       |         |
| Bachelor degree or above       | 76 (9.8)         | 71 (9.2)         |         |
| Current smoker                 | 325 (42.0)       | 312 (40.4)       | 0.502   |
| Current drinker                | 180 (23.3)       | 182 (23.5)       | 0.904   |
| Hypertension                   | 438 (56.7)       | 438 (56.7)       | 1.000   |
| Coronary heart disease         | 113 (14.6)       | 115 (14.9)       | 0.886   |
| History of stroke              | 151 (19.5)       | 142 (18.4)       | 0.559   |
| Diabetes mellitus              | 148 (19.1)       | 149 (19.3)       | 0.949   |
| Atrial fibrillation            | 70 (9.1)         | 76 (9.8)         | 0.602   |
| SBP, mmHg                      | 152.7 (22.6)     | 153.4 (23.0)     | 0.524   |
| OTT, mins                      | 171 (133-210)    | 178 (130-220)    | 0.530   |
| DNT, mins                      | 55 (35-86)       | 55 (35-90)       | 0.527   |
| NIHSS score                    | 6.0 (3.0-11.0)   | 5.0 (3.0-10.0)   | 0.534   |
| TOAST classification           |                  |                  | 0.232   |
| LAA                            | 368 (47.6)       | 379 (49.0)       |         |
| CE                             | 90 (11.6)        | 99(12.8)         |         |
| SAO                            | 254 (32.9)       | 218 (28.2)       |         |
| ODC                            | 18 (2.3)         | 19 (2.5)         |         |
| UND                            | 43 (5.6)         | 58 (7.5)         |         |
| Hospital classification        |                  |                  | 0.643   |
| Tertiary                       | 712 (92.1)       | 707 (91.5)       |         |
| Secondary                      | 61 (7.9)         | 66 (8.5)         |         |

Data are n/N (%), mean (SD) or median (IQR)

BMI: body mass index. CE: cardioembolism. DNT: door-to-needle time. LAA: large-artery atherosclerosis. NIHSS: National Institutes of Health Stroke Scale. ODC: stroke of other determined cause. OTT: onset-to-treatment time. r-tPA: recombinant tissue plasminogen activator. SAO: small-artery occlusion. SBP: systolic blood pressure. TOAST: Trial of Org 10172 in Acute Stroke Treatment. UK: urokinase. UND: stroke of undetermined cause.

Table S2 Effectiveness and safety outcomes after propensity score matching in patients with 0.9 mg/kg r-tPA and 1.0-1.5×1,000,000 U UK.

| Outcome                        | r-tPA<br>(N=773) | UK<br>(N=773) | OR or mean<br>difference (95% CI) | P-value |
|--------------------------------|------------------|---------------|-----------------------------------|---------|
| mRS 0 to 1 at 90 days          | 553 (71.5)       | 535 (69.2)    | 1.12 (0.90-1.39)                  | 0.316   |
| mRS 0 to 2 at 90 days          | 639 (82.7)       | 618 (79.9)    | 1.20 (0.93-1.55)                  | 0.171   |
| mRS distribution at 90 days    |                  |               |                                   | 0.336   |
| 0                              | 303 (39.2)       | 272 (35.2)    |                                   |         |
| 1                              | 250 (32.3)       | 263 (34.0)    |                                   |         |
| 2                              | 86 (11.1)        | 83 (10.7)     |                                   |         |
| 3                              | 60 (7.8)         | 68 (8.8)      |                                   |         |
| 4                              | 34 (4.4)         | 33 (4.3)      |                                   |         |
| 5                              | 21 (2.7)         | 20 (2.6)      |                                   |         |
| 6                              | 19 (2.5)         | 34 (4.4)      |                                   |         |
| ΔNIHSS score to 24 hours§      | 2.4 ± 4.6        | 2.0 ± 4.4     | 0.33 (-0.12-0.79)                 | 0.149   |
| ΔNIHSS score to 14 days§       | 4.0 ± 5.7        | 3.7 ± 5.6     | 0.35 (-0.21-0.92)                 | 0.223   |
| sICH at 36 hours               | 2 (0.6)          | 1 (0.3)       | 2.36 (0.21-26.08)                 | 0.485   |
| Other bleeding events          | 8 (1.0)          | 7 (0.9)       | 1.14 (0.41-3.17)                  | 0.795   |
| Recurrent stroke at 90 days    | 11 (1.5)         | 18 (2.4)      | 1.67 (0.78-3.57)                  | 0.183   |
| All-cause mortality at 90 days | 19 (2.5)         | 34 (4.4)      | 0.55 (0.31-0.97)                  | 0.050   |

CI: confidence interval. mRS: modified Rankin scale. NIHSS: National Institutes of Health Stroke Scale. OR: odds ratio. r-tPA: recombinant tissue plasminogen activator. sICH: symptomatic intracerebral hemorrhage. UK: urokinase.

§from baseline.

Table S3 Effectiveness and safety outcomes for r-tPA and UK of patients with NIHSS scores 1 to 5.

| Outcome                        | r-tPA<br>n/N (%) | UK<br>n/N (%)  | Unadjusted OR or mean<br>difference (95% CI) | P-value | Adjusted OR or mean<br>difference (95% CI) * | P-value |
|--------------------------------|------------------|----------------|----------------------------------------------|---------|----------------------------------------------|---------|
| mRS 0 to 1 at 90 days          | 351/404 (86.9)   | 498/581 (85.7) | 0.91 (0.63-1.31)                             | 0.602   | 0.77 (0.51-1.17)                             | 0.224   |
| mRS 0 to 2 at 90 days          | 385/404 (95.3)   | 544/581 (93.6) | 0.73 (0.41-1.28)                             | 0.267   | 0.54 (0.27-1.08)                             | 0.082   |
| mRS distribution at 90 days    |                  |                |                                              | 0.620   |                                              | 0.424   |
| 0                              | 194/404 (48.0)   | 265/581 (45.6) |                                              |         |                                              |         |
| 1                              | 157/404 (38.9)   | 233/581 (40.1) |                                              |         |                                              |         |
| 2                              | 34/404 (8.4)     | 46/581 (7.9)   |                                              |         |                                              |         |
| 3                              | 7/404 (1.7)      | 18/581 (3.1)   |                                              |         |                                              |         |
| 4                              | 4/404 (1.0)      | 10/581 (1.7)   |                                              |         |                                              |         |
| 5                              | 1/404 (0.2)      | 3/581 (0.5)    |                                              |         |                                              |         |
| 6                              | 7/404 (1.7)      | 6/581 (1.0)    |                                              |         |                                              |         |
| ΔNIHSS score to 24 hours §     | 0.7 ± 3.1        | 0.9 ± 2.3      | 0.13 (-0.51-0.17)                            | 0.319   | 0.16 (-0.42-0.19)                            | 0.446   |
| ΔNIHSS score to 14 days §      | 1.3 ± 3.8        | 1.4 ± 2.9      | 0.22 (-0.47-0.38)                            | 0.836   | 0.24 (-0.51-0.43)                            | 0.866   |
| sICH at 36 hours               | 3/404 (0.7)      | 1/581 (0.2)    | 0.23 (0.02-2.22)                             | 0.204   | 0.00                                         | 0.993   |
| Other bleeding events          | 6/404 (1.5)      | 1/581 (0.2)    | 0.11 (0.02-0.95)                             | 0.045*  | 0.15 (0.02-1.29)                             | 0.083   |
| Recurrent stroke at 90 days    | 5/404 (1.2)      | 11/581 (1.9)   | 0.65 (0.22-1.88)                             | 0.427   | 0.62 (0.19-2.04)                             | 0.434   |
| All-cause mortality at 90 days | 7/404 (1.7)      | 6/581 (1.0)    | 0.59 (0.20-1.77)                             | 0.349   | 1.04 (0.20-5.44)                             | 0.966   |

CI: confidence interval. mRS: modified Rankin scale. NIHSS: National Institutes of Health Stroke Scale. OR: odds ratio. r-tPA: recombinant tissue plasminogen activator. sICH: symptomatic intracerebral hemorrhage. UK: urokinase.

\*Propensity scores adjustment for all baseline variables in the model. §from baseline.

Table S4 Effectiveness and safety outcomes for r-tPA and UK of patients with NIHSS scores 6 to 10.

| Outcome                        | r-tPA<br>n/N (%) | UK<br>n/N (%)  | Unadjusted OR or mean<br>difference (95% CI) | P-value | Adjusted OR or mean<br>difference (95% CI) * | P-value |
|--------------------------------|------------------|----------------|----------------------------------------------|---------|----------------------------------------------|---------|
| mRS 0 to 1 at 90 days          | 135/205 (65.9)   | 191/301 (63.5) | 0.90 (0.62-1.31)                             | 0.580   | 0.89 (0.59-1.34)                             | 0.579   |
| mRS 0 to 2 at 90 days          | 165/205 (80.5)   | 233/301 (77.4) | 0.83 (0.54-1.29)                             | 0.407   | 0.79 (0.49-1.27)                             | 0.320   |
| mRS distribution at 90 days    |                  |                |                                              | 0.228   |                                              | 0.798   |
| 0                              | 69/205 (33.7)    | 87/301 (28.9)  |                                              |         |                                              |         |
| 1                              | 66/205 (32.2)    | 104/301 (34.6) |                                              |         |                                              |         |
| 2                              | 30/205 (14.6)    | 42/301 (14.0)  |                                              |         |                                              |         |
| 3                              | 21/205 (10.2)    | 36/301 (12.0)  |                                              |         |                                              |         |
| 4                              | 9/205 (4.4)      | 15/301 (5.0)   |                                              |         |                                              |         |
| 5                              | 7/205 (3.4)      | 6/301 (2.0)    |                                              |         |                                              |         |
| 6                              | 3/205 (1.5)      | 11/301 (3.7)   |                                              |         |                                              |         |
| ΔNIHSS score to 24 hours §     | 2.6 ± 4.0        | 2.6 ± 3.8      | 0.35 (-0.67-0.72)                            | 0.943   | 0.39 (-0.94-0.59)                            | 0.649   |
| ΔNIHSS score to 14 days §      | 4.2 ± 4.0        | 3.9 ± 4.6      | 0.40 (-0.50-1.07)                            | 0.471   | 0.41 (-0.71-0.91)                            | 0.808   |
| sICH at 36 hours               | 1/205 (0.5)      | 6/301 (2.0)    | 4.15 (0.50-34.72)                            | 0.189   | 4.30 (0.48-38.64)                            | 0.192   |
| Other bleeding events          | 2/205 (1.0)      | 1/301 (0.3)    | 0.34 (0.03-3.76)                             | 0.378   | 0.56 (0.05-6.56)                             | 0.641   |
| Recurrent stroke at 90 days    | 3/205 (1.5)      | 9/301 (3.0)    | 0.48 (0.13-1.80)                             | 0.278   | 0.51 (0.13-1.97)                             | 0.328   |
| All-cause mortality at 90 days | 3/205 (1.5)      | 11/301 (3.7)   | 2.55 (0.70-9.27)                             | 0.154   | 2.12 (0.55-8.20)                             | 0.278   |

CI: confidence interval. mRS: modified Rankin scale. NIHSS: National Institutes of Health Stroke Scale. OR: odds ratio. r-tPA: recombinant tissue plasminogen activator. sICH: symptomatic intracerebral hemorrhage. UK: urokinase.

\*Propensity scores adjustment for all baseline variables in the model. §from baseline.

Figure S1. Flow diagram of the participants selection

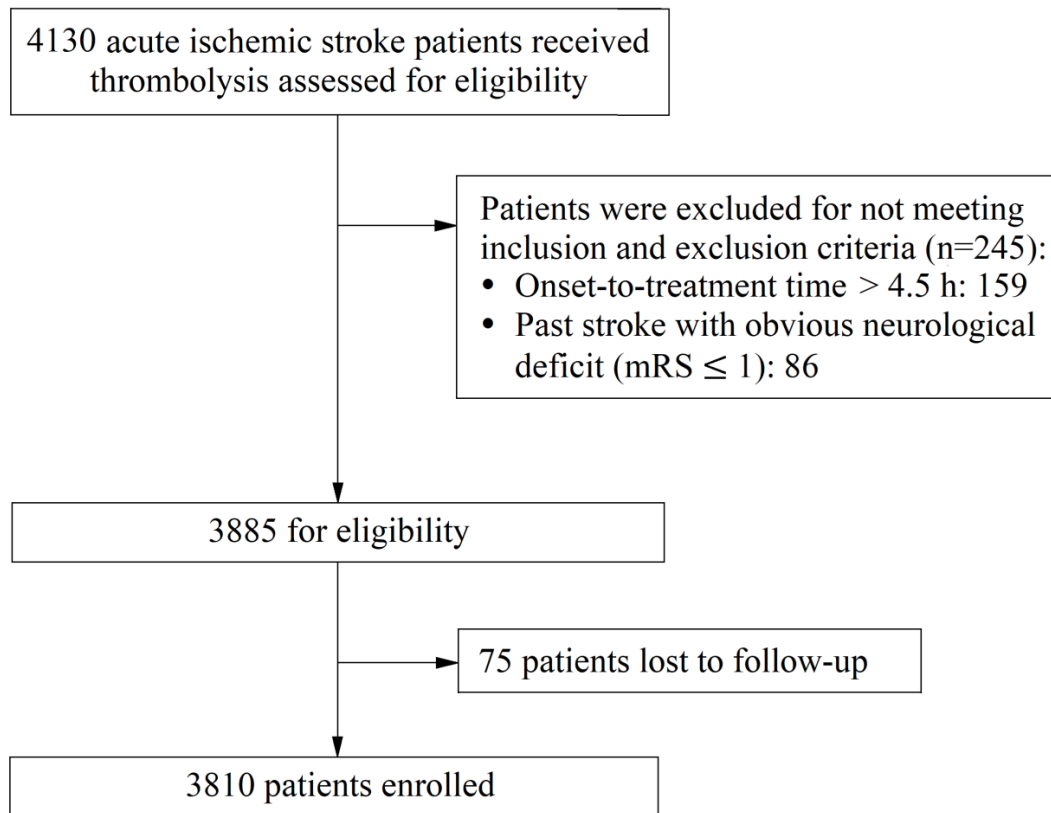

Figure S2. The distribution of r-tPA and UK across the participating sites

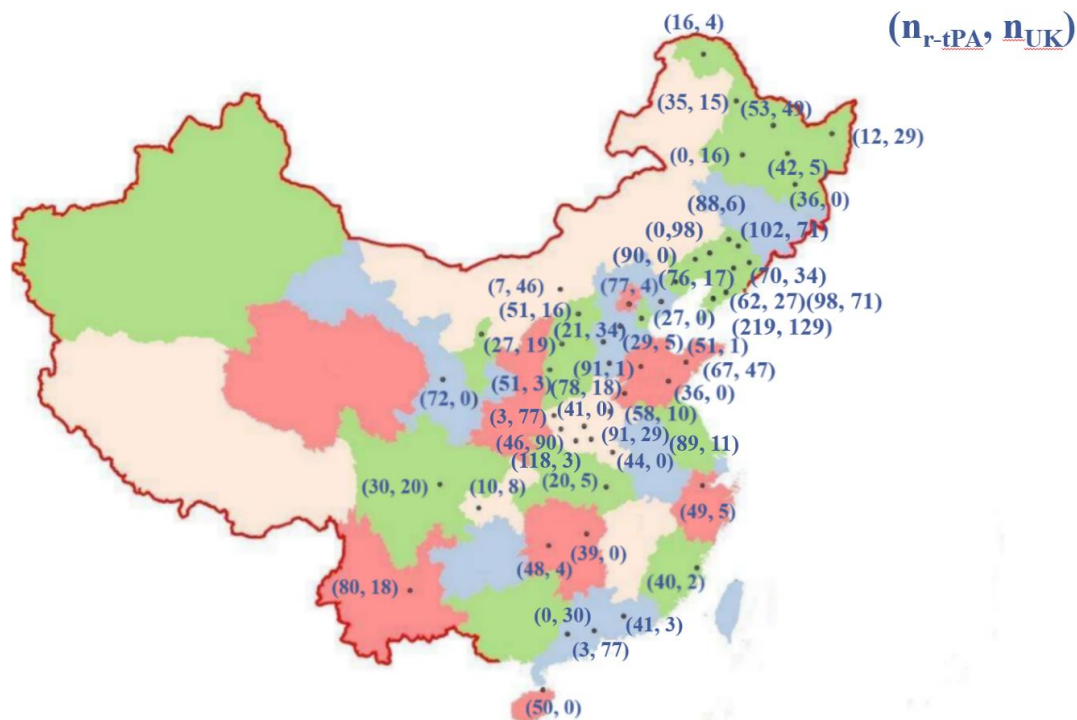

r-tPA, recombinant tissue plasminogen activator; UK, urokinase.

Figure S3. Subgroups

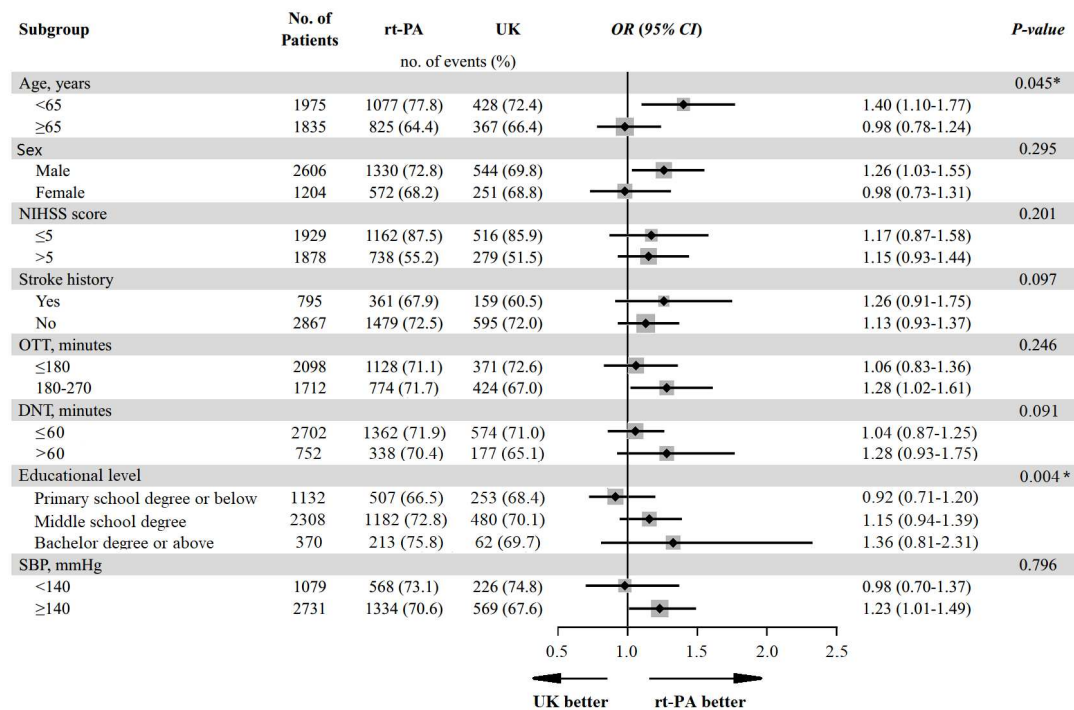

CI denotes confidence interval, DNT: door-to-needle time; NIHSS: National Institutes of Health Stroke Scale; OR: odds ratio; OTT: onset-to-treatment time; rt-PA: recombinant tissue plasminogen activator; UK: urokinase.
